# Supplementary material
Source: publisher site journal article supplement (https://oneecosystem.pensoft.net/article/download/suppl/8101361/)
Supplement: Supplementary file 1

## Sheet: Worksheet
	Urban	Cropland	Grassland	Woodland and forest	Heathland and shrub	Sparsely vegetated areas	Wetlands	Rivers and lakes
Extent account	6.4%	48.1%	9.4%	35.2%	0.0%	0.0%	0.1%	0.7%
Supply Table	11.3%	40.9%	7.8%	29.0%	9.8%	0.0%	0.1%	1.2%
